# Supplementary material
Source: PubMed Central journal article supplement (PMC3992645)
Supplement: 1324253111_pnas.201324253SI.pdf [file 1324253111_pnas.201324253SI.pdf]

# Supporting Information

Wang et al. 10.1073/pnas.1324253111

## SI Materials and Methods

**HPLC Analysis of Undecylprodigiosin Production.** The cultures of *Streptomyces coelicolor* in supplemented minimal medium (SMM) were centrifuged at  $16,200 \times g$  for 5 min. The cell pellets were re-suspended in Tris-HCl buffer (pH 7.2), sonicated for 10 min, and extracted by chloroform. The extracts were dried, redissolved in methanol, and filtered through a 0.22- $\mu\text{m}$  membrane. Then, the samples were subjected to HPLC analysis on a Shimadzu Prominence HPLC system with dual  $\lambda$  UV detector and a YMC polymer-C18 column ( $4.6 \times 250$  mm). Separation was performed at the following conditions: 0–15 min, acetonitrile (85–100%); 15–20 min, acetonitrile (100%); and 20–26 min, acetonitrile (100–85%) for a total run time of 26 min. The retention time of undecylprodigiosin (Red) at these conditions was 10.6 min; the corresponding peak areas detected at 542 nm were used to calculate the concentration of Red.

**LC-MS Analysis of Red.** The peaks matched Red standard was collected and further identified by LC-MS. Mass detection was performed on Agilent Technologies 6460 Triple Quad LC/MS ion-trap equipped with an electrospray interface. Optimized MS parameters were as follows: ion spray voltage, 3.5 kV; ion source temperature, 350 °C.

**Gel Mobility Shift Assays (EMSAs).** The DNA probe (~6 ng) was incubated with purified ScbR2 (0.3  $\mu\text{M}$ ) and different concentration of antibiotics at 25 °C for 30 min in a buffer containing 20 mM Tris-base (pH 7.5), 2 mM DTT, 5 mM  $\text{MgCl}_2$ , 0.5  $\mu\text{g}/\mu\text{L}$  calf BSA, and 5% glycerol in a total volume of 20  $\mu\text{L}$ . After incubation and electrophoresis, the nondenaturing 4.5% polyacrylamide gels were stained with SYBR Gold Nucleic Acid Gel Stain (Invitrogen) for 30 min in TBE buffer (89 mM Tris-base, 89 mM boric acid, 1 mM EDTA, pH 8.0). The staining images were photographed under a UV transilluminator by using Bio-Rad GelDoc XR.

**Construction of *gusA* Reporter Plasmids and Reporter Plasmid-Containing Strains.** To construct the plasmid pLCgus, *gusA* was amplified with primers gusAF and gusAR from pGusT-ermE-E\*, and the vector fragments of pLC803 were amplified with primers LCF and LCR from pLC803. Then, the two fragments were ligated by the enzymatic assembly method described by Gibson et al. (1) to generate pLCgus. To construct the plasmids pLCgus-adpAp and pLCgus-redDp, the promoters of *adpA* (*adpAp*) and *redD* (*redDp*) were amplified with primer pairs adpApF/adpApR and redDpF/redDpR, respectively. The fragments of pLCgus were amplified with primers pLCgusF and pLCgusR. Then, the pLCgus fragments were enzymatic assembled with the promoters of *adpA* and *redD*, respectively. The plasmids pLCgus-adpAp and pLCgus-redDp were transformed into *S. coelicolor* M145,  $\Delta\text{scbR2}$ , and M145::scbR2 by conjugation, and the transformants were used to detect the activities of the corresponding promoters.

**$\beta$ -Glucuronidase Activity Assay.** To measure the glucuronidase activity of GusA, a spectrophotometric method was used (2). The transformants were inoculated into liquid SMM and grown for 48 h at 28 °C and 220 rpm. Mycelia (of 2-mL culture) were harvested by centrifugation, washed once with distilled water, and resuspended in 0.5 mL of lysis buffer (2). Lysis was performed at 37 °C for 15 min. Then, 5  $\mu\text{L}$  of 0.2 M 4-nitrophenyl  $\beta$ -D-glucuronide was added to the samples. When the reaction appeared yellow, 0.5 mL of 1 M  $\text{Na}_2\text{CO}_3$  was added to terminate the reactions (3). Absorption at 415 nm was measured and divided by the wet weight of used mycelia and the reaction time

to obtain Gus units (GU) [ $\text{A415}/(\text{g}\cdot\text{min})$ ]. The assays were performed in triplicate. Data are presented as the means  $\pm$  SD.

**ChIP-Quantitative PCR.** Samples of *S. coelicolor* M145 grown in SMM for different times were treated with 1% formaldehyde for 30 min at room temperature before glycine was added to a final concentration of 0.125 M to halt cross-linking. Cells were collected, washed with cold  $1 \times$  PBS twice, and resuspended in lysis buffer (50 mM Hepes, pH 7.5, 137 mM NaCl, 1 mM EDTA, 1% Triton X-100, 0.1% deoxycholate Na, 0.1% SDS, 1 mM PMSF, 1  $\mu\text{g}/\text{mL}$  leupeptin). The sample was sonicated for 20 min at 2 s/8 s at 300 W to shear chromosomal DNA into fragments ranging from 200 to 500 bp on average. After centrifugation at  $13,400 \times g$  for 10 min at 4 °C to remove debris, 1 mL of supernatants diluted with the same volume of lysis buffer were precleared with 50  $\mu\text{L}$  of salmon sperm (SS) DNA/Protein A Sepharose for 60 min at 4 °C. After centrifugation at  $1,100 \times g$  for 1 min, we transferred the supernatant to a new tube. ScbR2 monoclonal antibody was prepared by CoWin Biotech Co. Ltd. by using the method of Saito et al. (4). ScbR2 antibody was added to a final concentration of 1  $\mu\text{g}/\text{mL}$ , and the samples were incubated overnight at 4 °C on a rotating wheel. Then, 50  $\mu\text{L}$  of SS DNA/Protein A Sepharose was added, and incubation was continued for 8 h at 4 °C. The Sepharose beads were then washed with 1 mL of each of the following buffers: lysis buffer plus 0.5 M NaCl,  $1 \times$  LNDET (0.25 M LiCl, 1% Nonidet P-40, 1% deoxycholate, 1 mM EDTA, 10 mM Tris, pH 8) and 50 mM Tris-HCl (pH 8.0) and 1 mM EDTA. Immunoprecipitated complexes were then eluted from the beads with freshly made Elute buffer (1% SDS, 0.1 M  $\text{NaHCO}_3$ , 10 mM EDTA, pH 8.0). Then, 0.2 M NaCl was added to each tube, and cross-linking was reversed by incubation at 65 °C for 10 h. Residual proteins were degraded by the addition of 200  $\mu\text{g}/\text{mL}$  Protein K (in 10 mM EDTA and 40 mM Tris, pH 8.0) and incubation at 65 °C for 2 h, followed by phenol/chloroform/isopropanol alcohol extraction and ethanol precipitation. Pellets were washed with 70% EtOH and resuspended in 10  $\mu\text{L}$  of TE. Approximately 1–2  $\mu\text{L}$  was used for PCR. Quantitative PCR (qPCR) was used to determine the amounts of genomic DNA immunoprecipitated in the ChIP experiments. qPCR was performed by using the primer pairs redDpF/redDpR and adpApF/adpApR (Table S2) on Rotor-Gene Q and detected by the SYBR Green detection system with the following program: 95 °C for 15 min, 1 cycle; 95 °C for 10 s and 65 °C for 30 s, 40 cycles. The relative levels of *PadpA* and *PredD* coprecipitated with ScbR2 were calculated by comparison with their respective IgG controls.

**Construction of AdpA Overexpression Strains.** To construct the plasmid pEadpA, *adpA* was amplified with primers adpAF and adpAR (Table S2). The pIMEP fragments were amplified with primer pairs IMEPF/IMEPR. Then, the pIMEP and *adpA* fragments were enzymatic assembled (1). To construct the plasmid pRadpA, *adpA* was amplified with primers adpAF2 and adpAR2. The pGusT-ermE-E\* fragments were amplified with primer pairs GusTF and GusTR. The two fragments were enzymatic assembled (1). The plasmids pEadpA and pRadpA were transformed into *S. coelicolor* M145 by conjugation, and the transformants were used to observe the effects of *adpA* expression on Red production in liquid SMM or on plate; M145 was included as control.

**Preparations of Jadomycin Pathway Intermediates and Other Angucyclines.** Jadomycin B (JdB)–Nle (norleucine), JdB–Hse (homoserine), and JdA were isolated from *Streptomyces venezuelae*

ISP5230 cultures as described (5). We isolated 2,3-dehydro-UWM6 (DHU) from VS668 culture as described (6). Gaudimycin A and C were provided by M. Metsä-Ketelä (University of Turku, Turku,

Finland) (7). Landomycin D and A were provided by Biao Y. (Shanghai Institute of Organic Chemistry, Chinese Academy of Sciences) (8).

- Gibson DG, et al. (2009) Enzymatic assembly of DNA molecules up to several hundred kilobases. *Nat Methods* 6(5):343–345.
- Myronovskiy M, Welle E, Fedorenko V, Luzhetskyy A (2011) Beta-glucuronidase as a sensitive and versatile reporter in actinomycetes. *Appl Environ Microbiol* 77(15):5370–5383.
- Rudolph MM, Vockenhuber MP, Suess B (2013) Synthetic riboswitches for the conditional control of gene expression in *Streptomyces coelicolor*. *Microbiology* 159(Pt 7): 1416–1422.
- Saito Y, Watanabe Y, Saito E, Honjoh T, Takahashi K (2001) Production and application of monoclonal antibodies to human selenoprotein P. *J Health Sci* 47(4):346–352.
- Chen Y, et al. (2010) Characterization of JadH as an FAD- and NAD(P)H-dependent bifunctional hydroxylase/dehydrase in jadomycin biosynthesis. *ChemBioChem* 11(8): 1055–1060.
- Fan K, et al. (2012) Evaluation of the cytotoxic activity of new jadomycin derivatives reveals the potential to improve its selectivity against tumor cells. *J Antibiot (Tokyo)* 65(9):449–452.
- Kallio P, Liu Z, Mäntsälä P, Niemi J, Metsä-Ketelä M (2008) Sequential action of two flavoenzymes, PgaE and PgaM, in angucycline biosynthesis: Chemoenzymatic synthesis of gaudimycin C. *Chem Biol* 15(2):157–166.
- Yang X, Fu B, Yu B (2011) Total synthesis of landomycin A, a potent antitumor angucycline antibiotic. *J Am Chem Soc* 133(32):12433–12435.

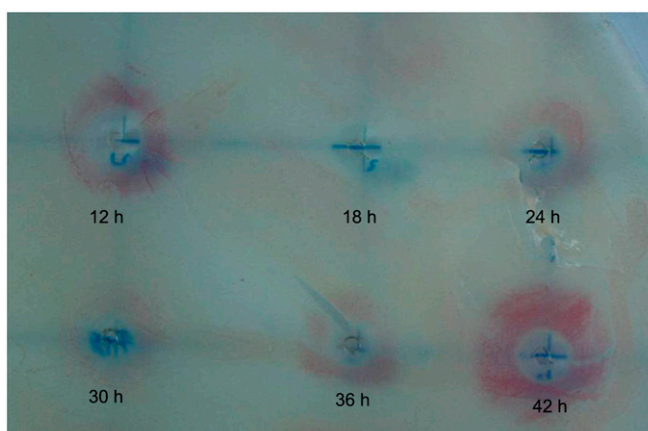

Fig. S1. Plate assay of the responses of *S. coelicolor* (grown on SMM agar) to extracts of *S. venezuelae* ISP5230 grown after different times in glucose–Mops medium.

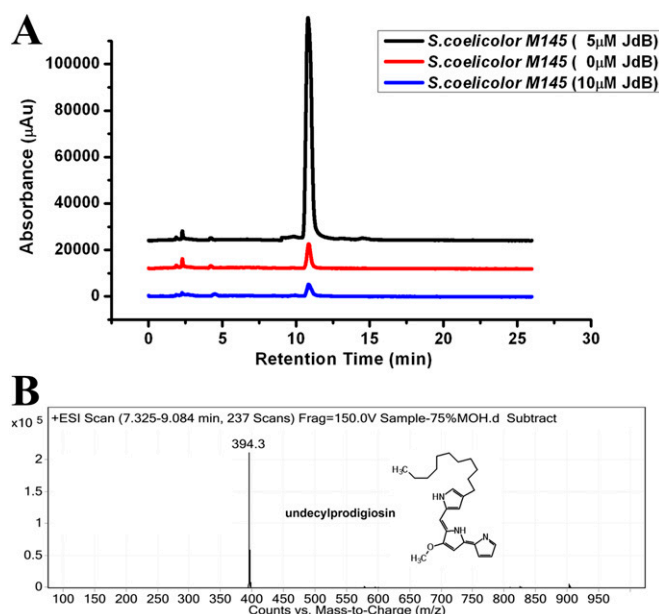

Fig. S2. Identification of Red by MS. (A) HPLC analysis of Red produced by *S. coelicolor* M145 in varying concentrations of JdB. (B) MS analysis of Red. The compound generates  $[M+H]^+$  ion at  $m/z$  of 394.3, matching the calculated molecular weight of Red.





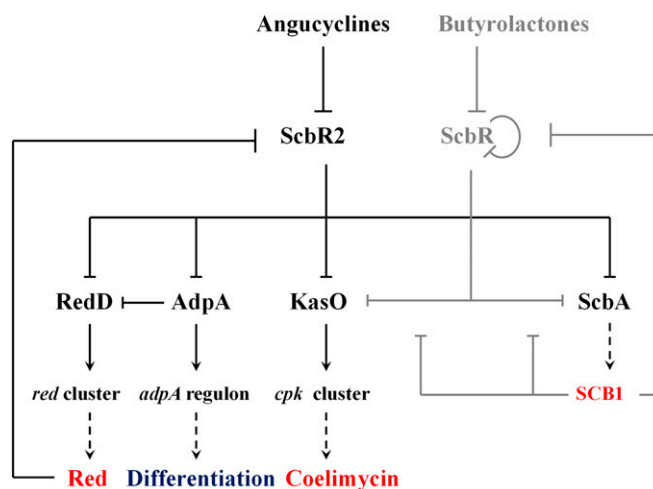

Fig. S9. The signal response network in *S. coelicolor* M145 controlled by ScbR2 and ScbR. The regulatory relationships governed by ScbR and ScbR2 are illustrated by arrows. Arrows, activation; blunt-end arrows, repression; dashed-line arrows, production of small molecules or phenotypes.

Table S1. Strains and plasmids used in this study

| Names                        | Relevant genotypes and purposes                                                                                                                                  | Sources       |
|------------------------------|------------------------------------------------------------------------------------------------------------------------------------------------------------------|---------------|
| <b>Strains</b>               |                                                                                                                                                                  |               |
| <i>S. coelicolor</i> M145    | Prototrophic derivative of <i>S. coelicolor</i> A3 (2)                                                                                                           | Ref. 1        |
| <i>S. venezuelae</i> ISP5230 | Source of JdB                                                                                                                                                    | Ref. 2        |
| M145::EadpA                  | AdpA overexpression strain with an integrated pEadpA in the genome                                                                                               | This work     |
| M145::RadpA                  | AdpA controlled-expression strain with an integrated pRadpA in the genome                                                                                        | This work     |
| ΔScbR2                       | Same as scbR2DM, the <i>scbR2</i> disruption mutant                                                                                                              | Ref. 3        |
| ΔScbR2::scbR2                | Same as scbR2COM, the <i>scbR2</i> complementation strain of ΔScbR2                                                                                              | Ref. 3        |
| M145::scbR2                  | Same as scbR2OE, <i>scbR2</i> overexpression strain                                                                                                              | Ref. 3        |
| DH5α                         | Host for reporter system                                                                                                                                         | Novagen       |
| BL21 (DE3)                   | Host for protein expression plasmids with T7-derived promoter                                                                                                    | Novagen       |
| <b>Plasmids</b>              |                                                                                                                                                                  |               |
| pET23b-ScbR2                 | For his <sub>6</sub> -ScbR2 expression (Amp <sup>R</sup> )                                                                                                       | Ref. 3        |
| pScbR2                       | For ScbR2 expression in the reporter system (Cm <sup>R</sup> )                                                                                                   | Ref. 3        |
| pOkasOlux                    | pCS26-Pac containing the <i>kasO</i> promoter-controlled <i>luxCDABE</i> reporter genes (Kan <sup>R</sup> , Hyg <sup>R</sup> )                                   | Ref. 3        |
| pLC803                       | <i>Escherichia coli</i> - <i>Streptomyces</i> shuttle plasmid, with φBT1- <i>int</i> , <i>oriT</i> , and <i>attP</i> (Ap <sup>R</sup> )                          | Xiaoming Ding |
| pGusT-ermE-E*                | Derived from pSET152, carrying a <i>gusA</i> reporter gene controlled by the riboswitch promoter ermE-E* (Ap <sup>R</sup> )                                      | Ref. 4        |
| pLCgus                       | Derived from pLC803 (φBT1- <i>int</i> , <i>oriT</i> , and <i>attP</i> ), carrying a promoterless <i>gusA</i> reporter gene                                       | This work     |
| pLCgus-adpAp                 | pLCgus with <i>adpA</i> promoter inserted in front of <i>gusA</i> (Hyg <sup>R</sup> )                                                                            | This work     |
| pLCgus-redDp                 | pLCgus with <i>redD</i> promoter inserted in front of <i>gusA</i> (Hyg <sup>R</sup> )                                                                            | This work     |
| pIMEP                        | Derived from pSET152, with <i>ermEp*</i> and a ribosomal binding site sequence inserted upstream of the multiple cloning site of pSET152 (Ap <sup>R</sup> )      | Ref. 3        |
| pEadpA                       | pIMEP with <i>adpA</i> inserted downstream of <i>ermEp*</i> for <i>adpA</i> overexpression (Ap <sup>R</sup> )                                                    | This work     |
| pRadpA                       | pGusT-ermE-E* in which <i>gusA</i> was replaced by <i>adpA</i> to put <i>adpA</i> under the control of riboswitch controlled promoter ermE-E* (Ap <sup>R</sup> ) | This work     |

Ap<sup>R</sup>, apramycin resistance; Cm<sup>R</sup>, chloramphenicol resistance; Hyg<sup>R</sup>, hygromycin resistance; Kan<sup>R</sup>, kanamycin resistance; *oriT*, origin of transfer from plasmid RK2; Tc<sup>R</sup>, tetracycline resistance.

- Kieser T, Bibb MJ, Buttner MJ, Chater KF, Hopwood DA (2000) *Practical Streptomyces Genetics* (John Innes Foundation, Norwich, U.K.), pp 410-413.
- Fan K, et al. (2012) Evaluation of the cytotoxic activity of new jadomycin derivatives reveals the potential to improve its selectivity against tumor cells. *J Antibiot (Tokyo)* 65(9):449-452.
- Xu G, et al. (2010) "Pseudo" gamma-butyrolactone receptors respond to antibiotic signals to coordinate antibiotic biosynthesis. *J Biol Chem* 285(35):27440-27448.
- Rudolph MM, Vockenhuber MP, Suess B (2013) Synthetic riboswitches for the conditional control of gene expression in *Streptomyces coelicolor*. *Microbiology* 159(Pt 7):1416-1422.

**Table S2. Primers used in this study**

| Primers | Sequence (5'–3')                                             | Applications              |
|---------|--------------------------------------------------------------|---------------------------|
| PscbAF  | CTGCACCCTGGTCCGGTGGACA                                       | EMSA                      |
| PscbAR  | TGAGGATCTCCGTGATCGTGGCA                                      |                           |
| HrdBF   | TGATGAGCAGGCTGCGCCTTCTCGCGC                                  | EMSA                      |
| HrdBR   | GCCCCCTCAGCCTTTCCCGCTCAATGAG                                 |                           |
| PkasOF  | GTGTATGTCACGGACGAGGAG                                        | EMSA                      |
| PkasOR  | GTGGCCTGCAACAGCAGGTA                                         |                           |
| RedDpF  | CCCGCAGCCCATGATGACAATGTGCAC                                  | EMSA                      |
| RedDpR  | GGTGCCGCCGATCTTTGGCTGGCTC                                    |                           |
| PAdpAF  | CCGGCAGCGGGCGCGGACG                                          | EMSA                      |
| PAdpAR  | TTGCGGGCTCGCCCGGACAGC                                        |                           |
| PredZF  | ATGACGCGGTGCGCAGCAC                                          | EMSA                      |
| PredZR  | GGCCGCACCTTCTTCGTG                                           |                           |
| PredVF  | TTGTGGGAGGAGGACTCAGC                                         | EMSA                      |
| PredVR  | GGACGGCCGCTTACCTG                                            |                           |
| PredQF  | GCTTGTTCGTAGGTGGTGCTC                                        | EMSA                      |
| PredQR  | AGGTGTCCATCGTCCGCTC                                          |                           |
| redDpQF | GTTCCGTTGAACCGGAGTGC                                         | ChIP-qPCR                 |
| redDpQR | GTCATCCACCGAACGATCGGAT                                       |                           |
| adpApqF | TGCAACGCTTCGTGATCGAC                                         | ChIP-qPCR                 |
| adpApqR | GGTCAAGATCGAATCTACTG                                         |                           |
| gusAF   | GGCTGCAGCTCACGGTAACTGATGCCAGTGCCAAGCTTGGGCTGC                | pLCgus                    |
| gusAR   | GTGCCCTGAATGAAGTGCAGGACGAGGCAGTAGTCCTGTCCGGTTTCGCCAC         |                           |
| LCF     | CTGCCTCGTCTGCAAGTTCATTC                                      | pLCgus                    |
| LCR     | GCATCAGTTACCGTGAGCTGC                                        |                           |
| adpApF  | GGCCGCAGACCGGTGATCTTGTGTCCTCCTTAGCAGACTGCTAAGCCCCCTCGGTG     | pLCgus-adpAp              |
| adpApR  | TTCTCGACCTCGTTCATCGTCAAGTGTAAATAGGGTCTTCGTCTGCTGCTGCGGCGTTCC |                           |
| redDpF  | ACGGGCGCAGACCGGTGATCTTGTGTCCTCCTTAGCAGCCACCGAACGATCGGATTCG   | pLCgus-redDp              |
| redDpR  | TCTCGACCTCGTTCATCGTCAAGTGTAAATAGGGTCTTCGTGATCACGGCGACCGTGTG  |                           |
| pLCgusF | GAAGACCTATTAACACTTGACG                                       | pLCgus-adpAp&pLCgus-redDp |
| pLCgusR | CTGCTAAGGAGGCAACAAGATG                                       |                           |
| IMEPF   | TACCGAATTCATCTGAATCGATGCGTAATCATG                            | pEadpA                    |
| IMEPR   | ATCTCTAGATCCGTTCCGCTAG                                       |                           |
| adpAF1  | TGCCGGTGGTAGGATCTAGCGGAACGGATCTAGAGATATGAGCCACGACTCCACCG     | pEadpA                    |
| adpAR1  | TATGACATGATTACGCATCGATTGATGAAATCGGTAGTTCGAGGGAGCCGCTGCTC     |                           |
| GusTF   | TGATAAGCATTACCCTGTTATCTC                                     | pRadpA                    |
| GusTR   | GCGGTGGAGTCGTGGCTCATCTTGTGTCCTCCTTAGCAGG                     |                           |
| adpAF2  | CCTGCTAAGGAGGCAACAAGATGAGCCACGACTCCACCGC                     | pRadpA                    |
| adpAR2  | TCCTTCTTGTGTCTAGAGATAACAGGGTAATGCTTATCACGGCGCTGCGCTGGC       |                           |
